# Supplementary material for: Candida auris cells form giant lipid droplets to survive in harsh environments
Source: Springer Nature journal article supplement (doi:10.1038/s42003-025-08204-7), 2025-05-22
Supplement: MOESM1 [file 42003_2025_8204_MOESM1_ESM.pdf]

# Supplementary information for

## *Candida auris* cells form giant lipid droplets to survive in harsh environments

Qiushi Zheng<sup>1#</sup>, Chao Li<sup>1#</sup>, Tianren Hu<sup>2,3#</sup>, Jian Bing<sup>1</sup>, Clarissa J. Nobile<sup>4,5</sup>, Haiqing

Chu<sup>2,3\*</sup>, and Guanghua Huang<sup>1,6\*</sup>

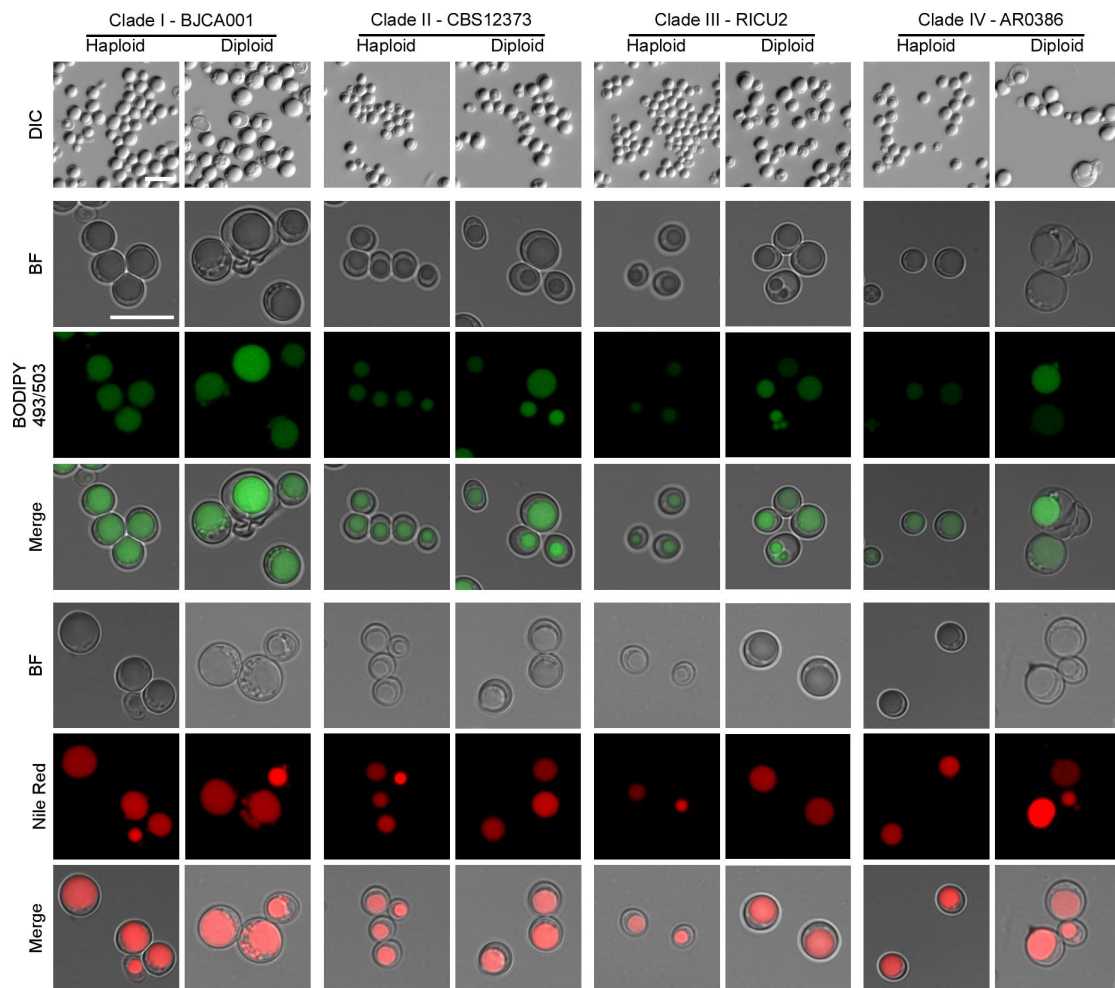

**Supplementary Figure 1. Formation of gLDs in *C. auris* strains of the four major genetic clades.**

BODIPY 493/503 and Nile red staining assays for lipid droplets were performed. Haploid and diploid cells of strains BJCA001 (Clade I), CBS12373 (Clade II), RICU2 (Clade III), and AR0386 (Clade IV) were initially grown on

12 YPD medium for 2 days at 30°C, and then spotted onto Kleyn medium ( $5 \times 10^6$   
 13 cells in 10  $\mu$ L ddH<sub>2</sub>O) and incubated at 30°C for 7 days. BODIPY493/503 and  
 14 Nile Red staining assays for lipid droplets, respectively. BF, brightfield. Scale  
 15 bar for DIC, 10  $\mu$ m; scale bar for brightfield and stained cells, 10  $\mu$ m.

16

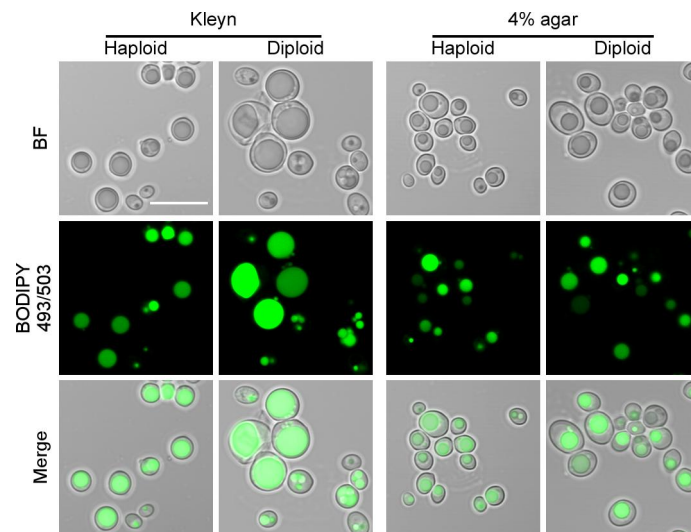

17

18 **Supplementary Figure 2. Formation of gLDs in *C. auris* on Kleyn and**  
 19 **water agar media.**

20 *C. auris* haploid and diploid cells of strain AR0386 were initially grown on YPD  
 21 medium for 2 days at 30°C, and then spotted onto Kleyn or water agar medium  
 22 ( $5 \times 10^6$  cells in 10  $\mu$ L ddH<sub>2</sub>O) and incubated at 30°C for 7 days. The water  
 23 agar medium contained only 4% agar (BD Bacto™ Agar, BD Biosciences) and  
 24 no other nutritional components. *C. auris* cells were stained with BODIPY  
 25 493/503. BF, brightfield. Scale bar, 10  $\mu$ m.

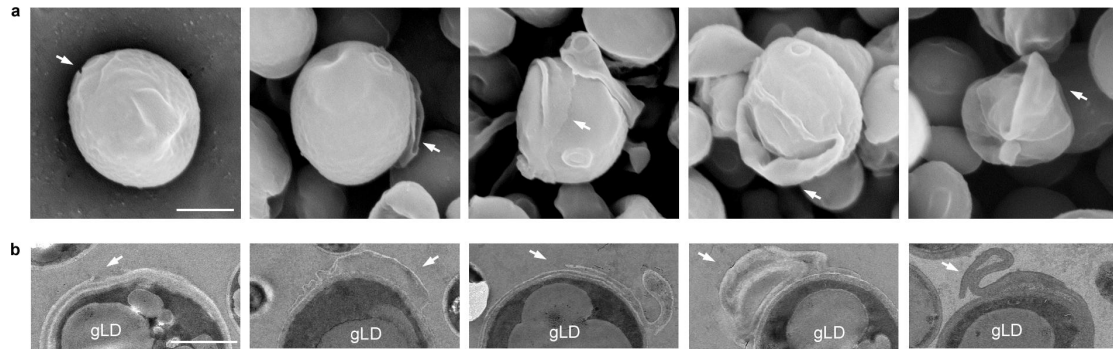

**Supplementary Figure 3. SEM and TEM images of *C. auris* cells with gLDs.**

*C. auris* diploid cells of strain AR0386 were initially grown on YPD medium for 2 days at 30°C, and then spotted onto Kleyn medium ( $5 \times 10^6$  cells in 10  $\mu$ L ddH<sub>2</sub>O) and incubated at 30°C for 7 days. (a) SEM images. (b) TEM images of the cell wall structure. Arrows indicate detached cell wall structures. Scale bar, 2  $\mu$ m.

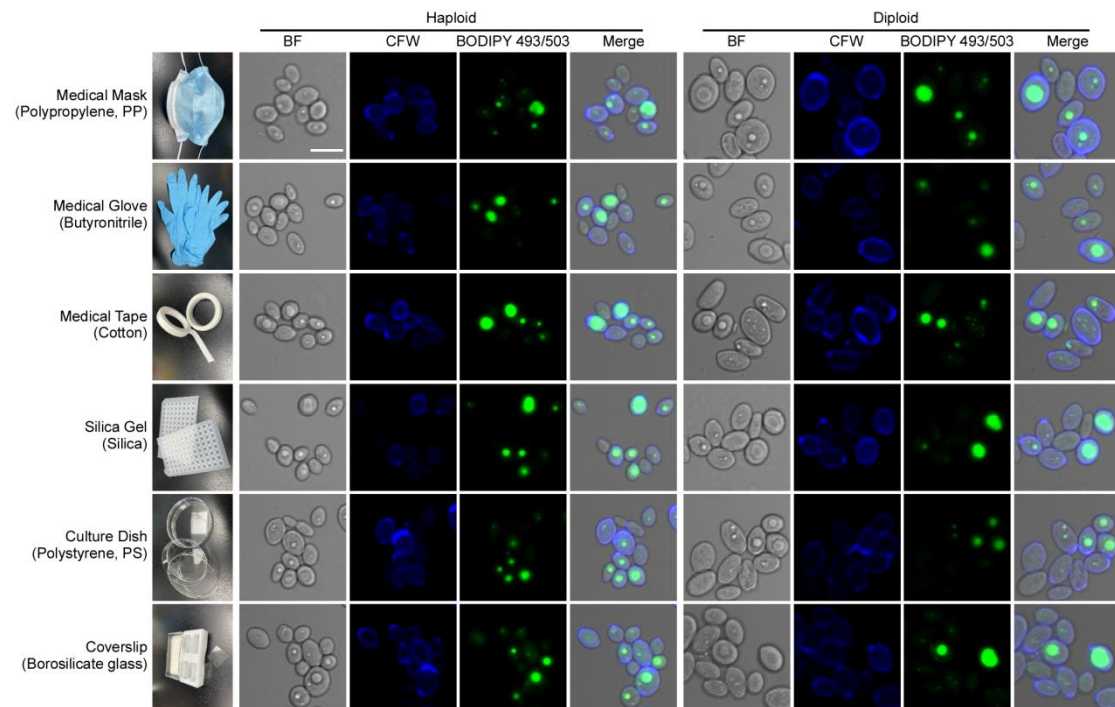

**Supplementary Figure 4. Formation of gLDs in *C. auris* cells grown on the surfaces of medical supplies.**

Haploid and diploid cells of strain AR0386 were initially grown on YPD medium for 2 days at 30°C, then  $5 \times 10^6$  cells in 3  $\mu$ L ddH<sub>2</sub>O were then inoculated onto the surfaces of the medical supplies and incubated at 30°C for 14 days. *C. auris* cells were then collected, washed with PBS, and stained with BODIPY 493/503 and calcofluor white (CFW). BF, brightfield. Scale bar, 5  $\mu$ m.

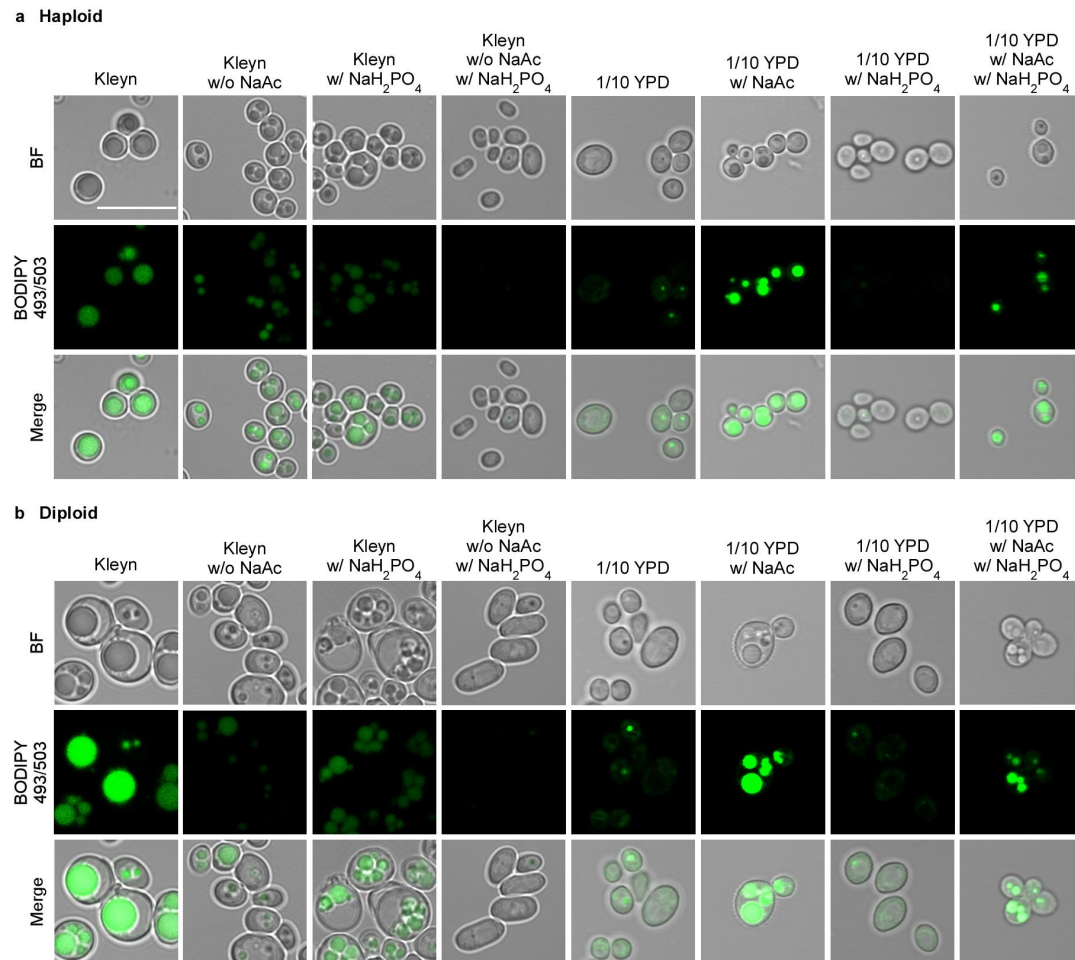

**Supplementary Figure 5. Effect of acetate and phosphate (NaAc and NaH<sub>2</sub>PO<sub>4</sub>) on the formation of lipid droplets in *C. auris*.**

Haploid (a) and diploid (b) cells were initially grown on YPD medium for 2 days at 30°C, and then spotted onto Kleyn and 1/10 YPD media at  $5 \times 10^6$  cells in 10  $\mu$ L ddH<sub>2</sub>O and incubated at 30°C for 7 days. *C. auris* cells stained with BODIPY 493/503. BF, brightfield. Scale bar, 10  $\mu$ m. Kleyn, Kleyn medium (original recipe, containing NaAc but no NaH<sub>2</sub>PO<sub>4</sub>). Modified Kleyn media: Kleyn w/o NaAc; Kleyn w/ NaH<sub>2</sub>PO<sub>4</sub> (containing NaAc and NaH<sub>2</sub>PO<sub>4</sub>); Kleyn w/o NaAc w/ NaH<sub>2</sub>PO<sub>4</sub> (mKleyn, containing NaH<sub>2</sub>PO<sub>4</sub> but no NaAc). 1/10 YPD medium: 2% agar + 1:10 dilution of YPD nutrient solution. The presence and absence of NaH<sub>2</sub>PO<sub>4</sub> and NaAc in modified YPD media are indicated in the figures and are the same as the modified Kleyn media.

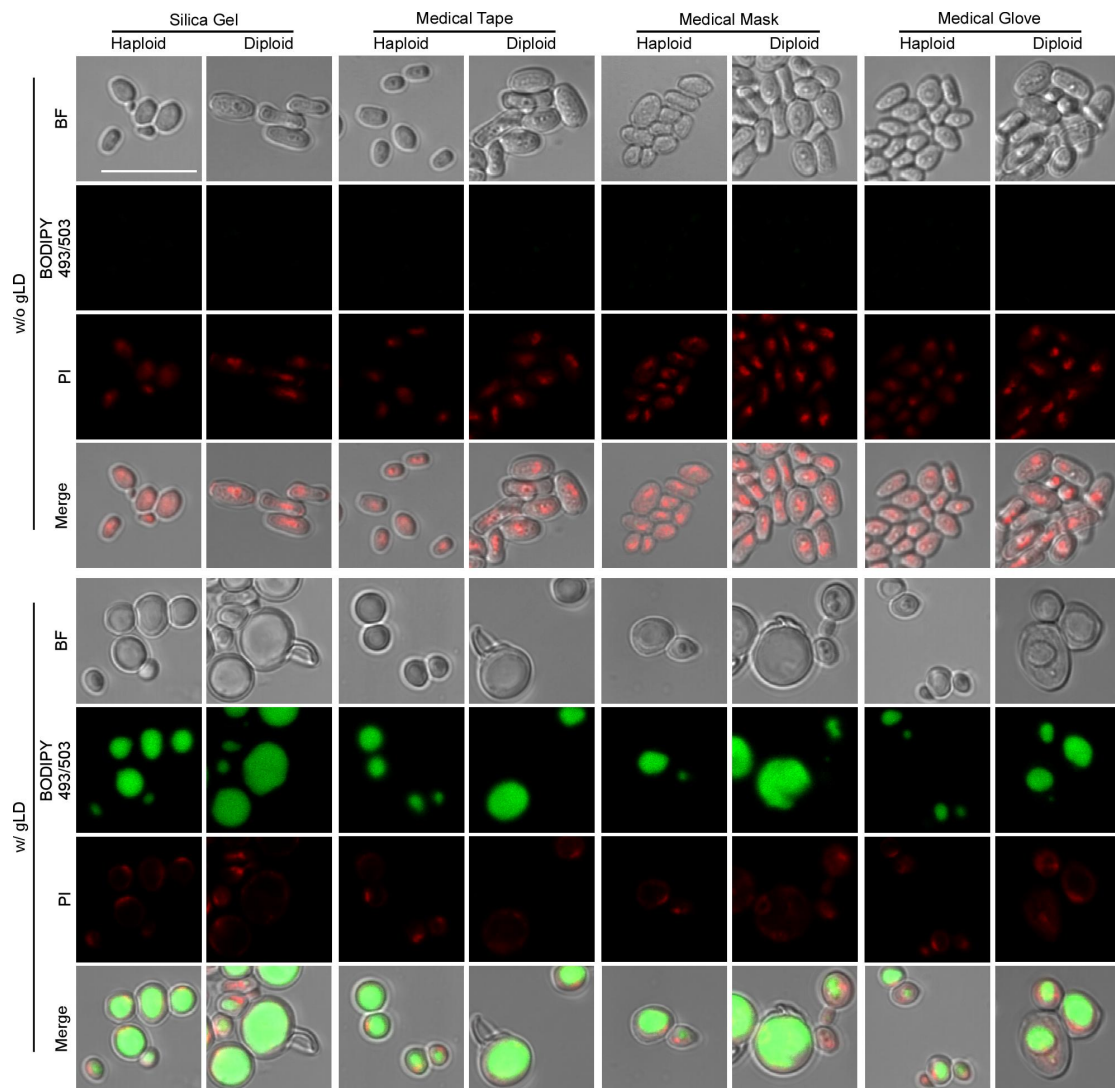

**Supplementary Figure 6. Comparison of viability of *C. auris* cells with (w/) or without (w/o) gLDs on the surfaces of medical supplies.**

*C. auris* cells w/ or w/o gLDs were collected from the cultures on the Kleyn or mKleyn media (w/o NaAc and w/  $\text{NaH}_2\text{PO}_4$ ) incubated at  $30^\circ\text{C}$  for 7 days, respectively. The cells ( $5 \times 10^6$  cells in  $3 \mu\text{L}$  ddH<sub>2</sub>O) were then spotted onto the surfaces of silica gel, medical tape, masks, or gloves at  $30^\circ\text{C}$  for 25 days. *C. auris* cells were collected, washed with PBS, and then stained with PI and BODIPY 493/503. BF, brightfield. Scale bar,  $10 \mu\text{m}$ .



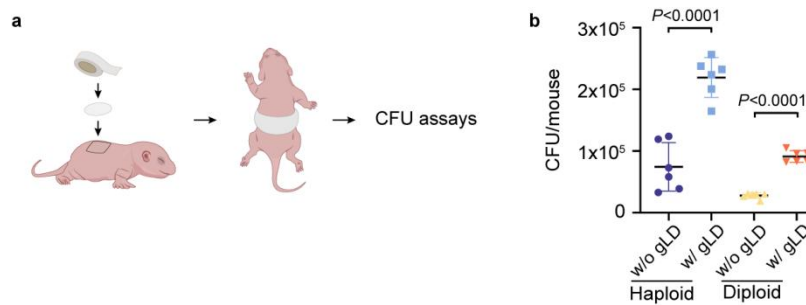

**Supplementary Figure 7. Comparison of skin colonization of *C. auris* cells with (w/) or without (w/o) gLDs.**

Haploid and diploid cells of strain AR0386 were examined. (a) Overview of experimental design. (b) CFU analysis of colonized *C. auris* cells. Approximately  $2 \times 10^6$  *C. auris* cells w/ or w/o gLDs (in 2  $\mu$ L PBS) were inoculated onto the dorsal back skin of newborn mice. After 3 days of infection, the infected skin areas were excised and used for CFU analyses on YPD medium. Six biological repeats were performed for each strain sample. Significant differences were determined using two-tailed, unpaired Student's *t*-tests. Dots represent the CFU numbers; error bars represent standard deviations.

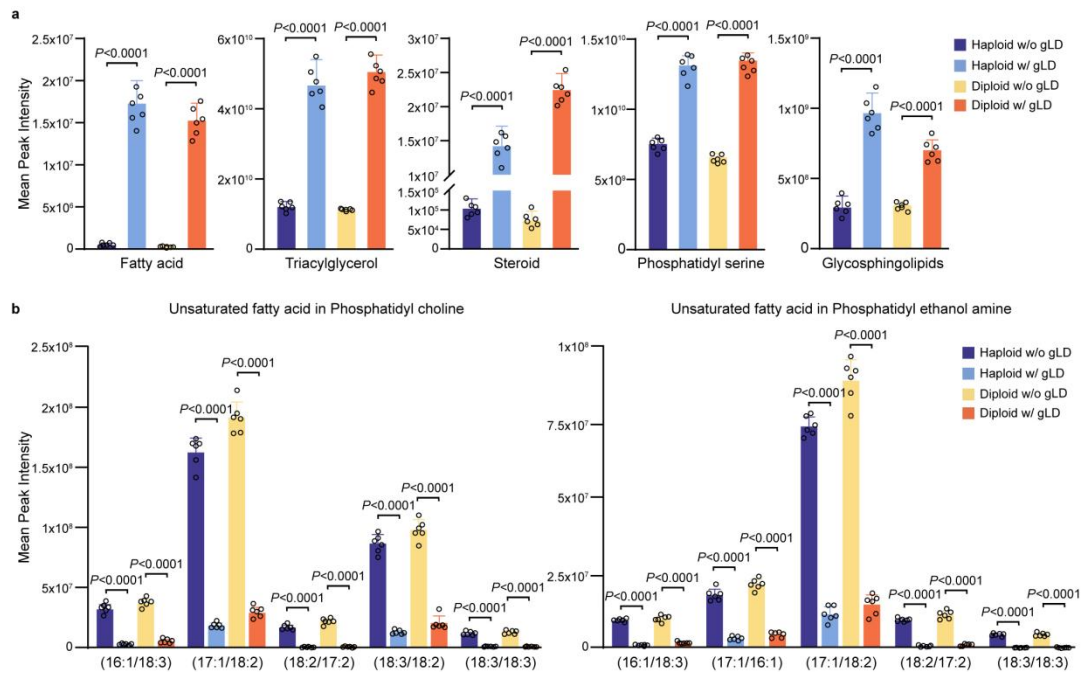

80

81 **Supplementary Figure 8. Different levels of lipid components and**  
 82 **unsaturated fatty acids in haploid and diploid *C. auris* cells with (w/) or**  
 83 **without (w/o) gLDs.**

84 (a) Relative levels of lipid components in haploid and diploid cells w/ or w/o  
 85 gLDs. (b) The level of unsaturated fatty acids in phospholipids. The y-axis  
 86 represents the mean peak intensity of lipids in each group. Significant  
 87 differences were determined using two-tailed, unpaired Student's *t*-tests. Error  
 88 bars represent standard deviations.

89



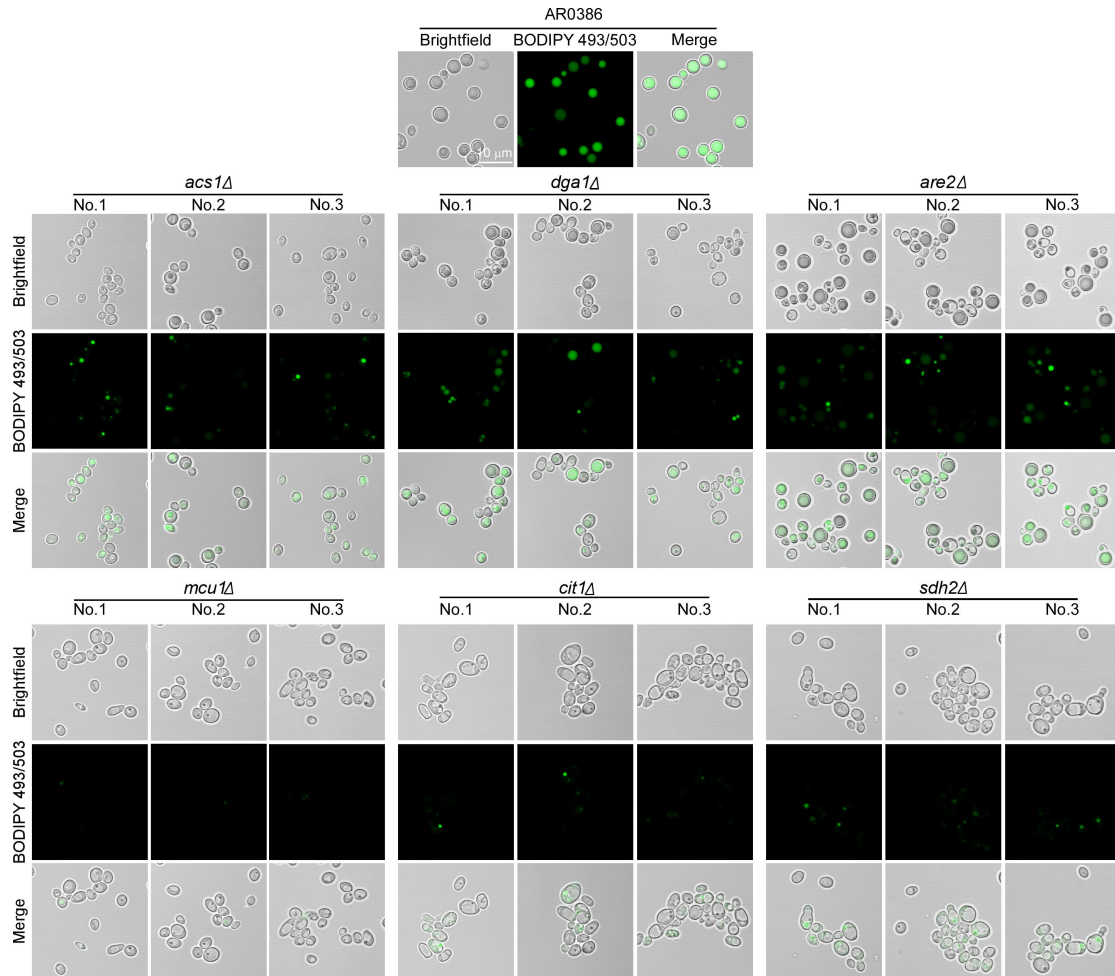

**Supplementary Figure 9. Formation of gLDs in the WT and three independent isolates of the mutant strains.**

*C. auris* cells of the WT strain AR0386, and the *acs1Δ*, *dga1Δ*, *are2Δ*, *mcu1Δ*, *cit1Δ*, and *sdh2Δ* mutant strains were initially grown on YPD medium at 30°C for 2 days, then replated onto Kleyn medium and incubated at 30°C for 7 days. Three independent isolates of each mutant strain were examined. BODIPY 493/503 staining assays were performed. Scale bar, 10 μm.

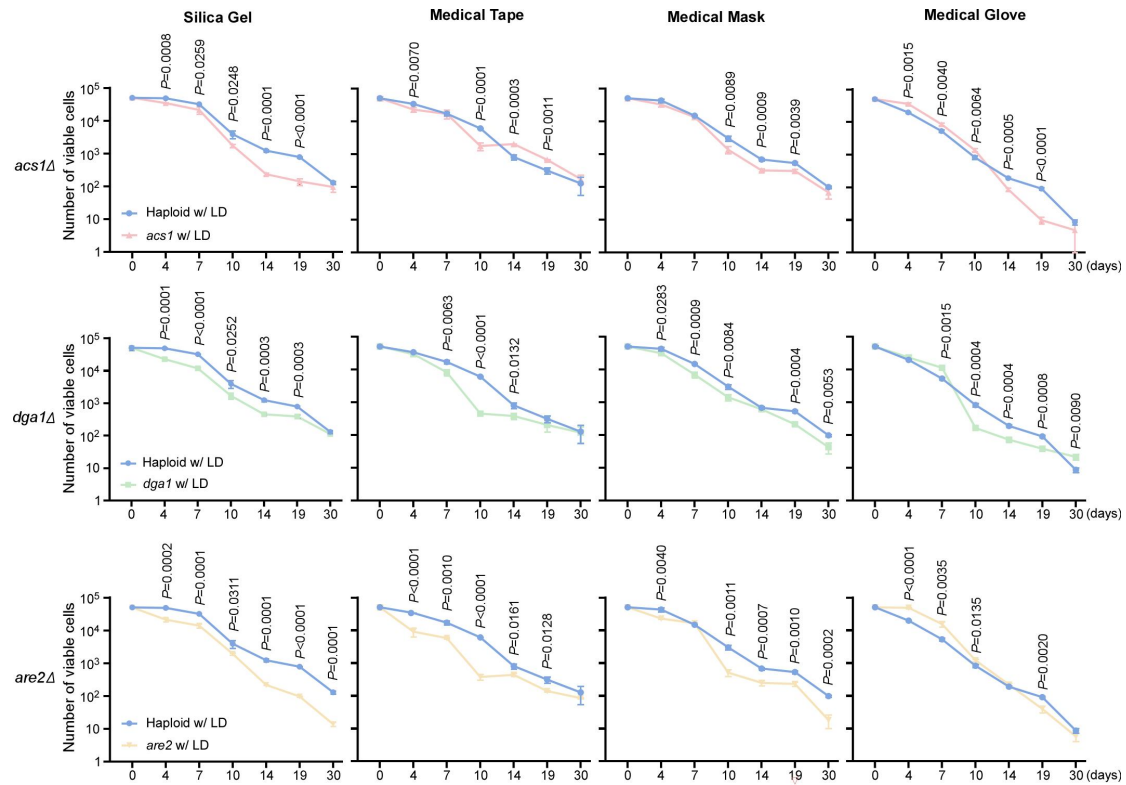

**Supplementary Figure 10. Survival curves of the WT, and the *acs1Δ*, *dga1Δ*, and *are2Δ* mutant strains on the surfaces of silica gel, medical tape, masks, and gloves.**

WT: blue curves. *C. auris* cells were first grown on YPD solid plates at 30°C for 2 days. Then  $5 \times 10^6$  cells in 10  $\mu$ L ddH<sub>2</sub>O were spotted onto Kley medium and incubated at 30°C for 7 days for the formation of lipid droplets. *C. auris* cells of the WT and mutant strains were collected. Approximately  $5 \times 10^6$  cells in 3  $\mu$ L ddH<sub>2</sub>O of each strain were spotted onto the surface of silica gel, medical tape, masks, and gloves for viability analyses. CFU assays were performed on day 4, 7, 10, 14, 19, and 30. A logarithmic scale was used for the y-axis. Three replicates were performed. Significant differences were determined using two-tailed, unpaired Student's *t*-tests. Error bars represent standard deviations.

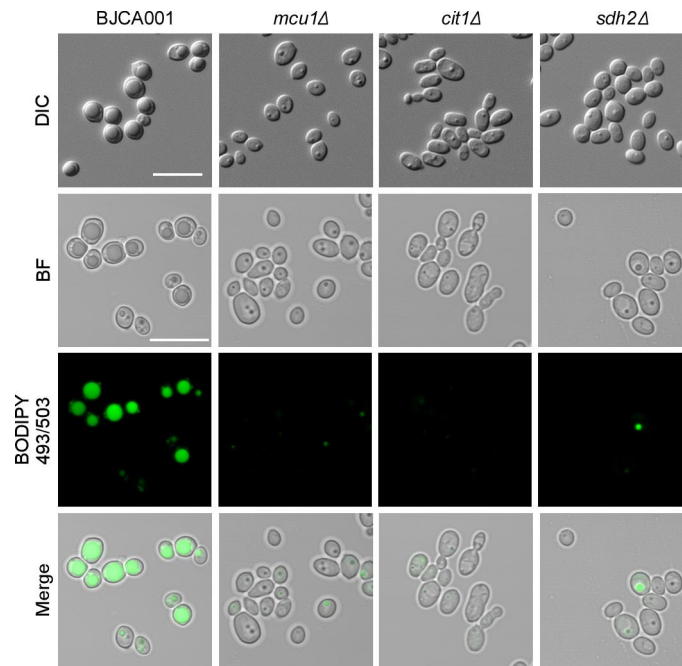

**Supplementary Figure 11. Analysis of lipid droplet formation of the WT (BJCA001), *mcu1*Δ, *cit1*Δ, and *sdh2*Δ mutant strains on Kleyn medium.**

Haploid cells of the WT strain BJCA001 and the *mcu1*Δ, *cit1*Δ, and *sdh2*Δ mutant strains were initially grown on YPD medium for 2 days at 30°C. Approximately  $5 \times 10^6$  cells in 10 μL ddH<sub>2</sub>O were spotted onto Kleyn medium and incubated at 30°C for 7 days for the formation of lipid droplets. *C. auris* cells were stained with BODIPY 493/503. BF, brightfield. Scale bar, 10 μm.

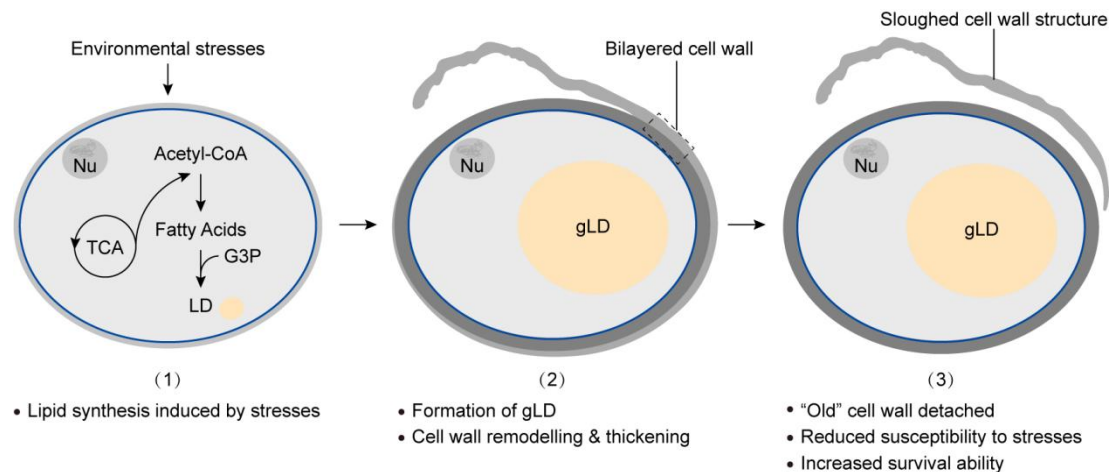

## Supplementary Figure 12. Schematic diagram of a proposed gLD

**formation mechanism.** Lipid droplets have crucial cross-functions in energy

storage and stress response when *C. auris* cells encounter harsh

environments. 1) After receiving environmental stress signals (such as NaAc,

or other nutrient-poor conditions), TCA cycle or acetyl-CoA synthetase begins

to continuously synthesize acetyl-CoA, the important precursor for lipid droplet

formation. Fatty acids in the activated acyl-CoA form sequentially add to the

backbone of glycerol-3-phosphate (G3P), and the intermediate products are

catalyzed by several acyltransferases (including Dga1), then TAGs are

synthesized. The structure of lipid droplets begins to take shape. 2) Lipid

droplets enlarge with the continuous synthesis of TAGs, meanwhile cell wall

remodeling or generation associated genes are highly expressed. The cell wall

doubles in thickness and a distinct cell wall shedding phenomenon is observed,

especially in diploid *C. auris* cells. 3) Due to gLD formation and cell wall

thickening, *C. auris* cells show increased survivability and enhanced

resistance to environmental stressors.

**Supplementary Table 1. Relative composition of cell wall components of *C. auris* cells with or without giant lipid droplets.**

| Strains (AR0386) | Alkaline soluble   | Alkaline insoluble |                 |
|------------------|--------------------|--------------------|-----------------|
|                  | Glycoproteins (µg) | Chitins (µg)       | β-glucans (µg)  |
| Haploid w/o gLD  | 82.16 ± 0.21       | 55.45 ± 11.34      | 132.65 ± 32.97  |
| Haploid w/ gLD   | 68.56 ± 2.13       | 134.01 ± 4.58      | 314.67 ± 57.57  |
| Diploid w/o gLD  | 194.56 ± 10.03     | 114.94 ± 0.54      | 484.55 ± 45.11  |
| Diploid w/ gLD   | 120.38 ± 1.89      | 363.85 ± 85.92     | 1039.18 ± 60.52 |

Notes: The relative contents of cell wall components ( $2 \times 10^9$  cells) were determined.
